# Supplementary material
Source: publisher site journal article supplement (https://www.dovepress.com/article/317019)
Supplement: Supplementary file 1 [file get_supplementary_file.php]

## SUPPLEMENTARY TABLES

**Supplement 1:** Crude and adjusted odds ratios for the association between 5ARI exposure and venous thromboembolism stratified by Age: BPH patients aged 40 – 79 in CPRD GOLD 1995 – 2015.

|                                                  | <b>Cases<br/>(n=266)</b> | <b>Controls<br/>(n=1061)</b> | <b>Crude OR<br/>(95% CI)</b> | <b>Adjusted* OR<br/>(95% CI)</b> |
|--------------------------------------------------|--------------------------|------------------------------|------------------------------|----------------------------------|
| <b>Age &lt;70 years</b>                          |                          |                              |                              |                                  |
| <b>Timing &amp; Number of 5ARI Prescriptions</b> |                          |                              |                              |                                  |
| <b>AB only</b>                                   | 67 (75.3)                | 247 (70.4)                   | 1.0 (reference)              | 1.0 (reference)                  |
| <b>Current 1 – 49 5ARI rxs</b>                   | 5 (5.6)                  | 32 (9.1)                     | 0.58 (0.22 – 1.54)           | 0.79 (0.28 – 2.24)               |
| <b>Current 50+ 5ARI rxs</b>                      | NR                       | 6 (1.7)                      | **                           | **                               |
| <b>Recent/Past/Distant past use of 5ARI</b>      | 6 (6.7)                  | 22 (6.3)                     | 1.01 (0.39 – 2.58)           | 1.25 (0.46 – 3.42)               |
| <b>5ARI +AB</b>                                  | 9 (10.1)                 | 44 (12.5)                    | 0.75 (0.35 – 1.62)           | 1.27 (0.50 – 3.22)               |
| <b>Age ≥70 years</b>                             |                          |                              |                              |                                  |
| <b>Timing &amp; Number of 5ARI Prescriptions</b> |                          |                              |                              |                                  |
| <b>AB only</b>                                   | 102 (57.6)               | 466 (65.6)                   | 1.0 (reference)              | 1.0 (reference)                  |
| <b>Current 1 – 49 5ARI rxs</b>                   | 23 (13.0)                | 68 (9.6)                     | 1.55 (0.92 – 2.60)           | 1.42 (0.83 – 2.45)               |
| <b>Current 50+ 5ARI rxs</b>                      | 14 (7.9)                 | 32 (4.5)                     | 2.00 (1.03 – 3.88)           | 1.90 (0.95 – 3.80)               |
| <b>Recent/Past/Distant past use of 5ARI</b>      | 14 (7.9)                 | 58 (8.2)                     | 1.10 (0.59 – 2.05)           | 1.00 (0.52 – 1.91)               |
| <b>5ARI +AB</b>                                  | 24 (13.6)                | 86 (12.1)                    | 1.28 (0.77 – 2.10)           | 1.15 (0.65 – 2.04)               |

Variables are presented as N (%); OR=Odds Ratio; 95%CI=95% Confidence Interval; NR= Not Reportable

Current use = 5ARI use less than 30 days prior to the index date; Recent use = 5ARI use 31 – 119 days prior to the index date; Past use = 5ARI use 120 – 305 days prior to the index date; Distant past use = 5ARI use more than 305 days prior to the index date.

\*Adjusted for cardiovascular disease, chronic kidney disease, switch, body mass index and CCI. Conditional on the matching factors.

\*\* Too few cases and/or controls

**Supplement 2:** Crude and adjusted odds ratios for the association between 5ARI exposure and venous thromboembolism stratified by Obesity Status: BPH patients aged 40 – 79 in CPRD GOLD 1995 – 2015.

|                                                  | Cases<br>(n=266) | Controls<br>(n=1061) | Crude OR<br>(95% CI) | Adjusted* OR<br>(95% CI) |
|--------------------------------------------------|------------------|----------------------|----------------------|--------------------------|
| <b>Obese</b>                                     |                  |                      |                      |                          |
| <b>Timing of 5ARI Prescriptions</b>              |                  |                      |                      |                          |
| <b>AB only</b>                                   | 53 (70.7)        | 145 (66.5)           | 1.0 (reference)      | 1.0 (reference)          |
| <b>Current use of 5ARI</b>                       | 12 (16.0)        | 20 (9.2)             | 1.64 (0.75 – 3.59)   | 2.71 (1.10 – 6.68)       |
| <b>Recent/Past/Distant past use of 5ARI</b>      | 4 (5.3)          | 20 (9.2)             | 0.55 (0.18 – 1.68)   | 0.67 (0.21 – 2.18)       |
| <b>Current use of 5ARI + AB</b>                  | 5 (6.7)          | 27 (12.4)            | 0.51 (0.19 – 1.38)   | 1.40 (0.39 – 5.06)       |
| <b>Recent/Past/Distant past use of 5ARI + AB</b> | NR               | 6 (2.8)              | 0.46 (0.05 – 3.88)   | 0.83 (0.08 – 8.46)       |
| <b>Not Obese</b>                                 |                  |                      |                      |                          |
| <b>Timing of 5ARI Prescriptions</b>              |                  |                      |                      |                          |
| <b>AB only</b>                                   | 100 (58.5)       | 520 (67.0)           | 1.0 (reference)      | 1.0 (reference)          |
| <b>Current use of 5ARI</b>                       | 32 (18.7)        | 109 (14.1)           | 1.53 (0.98 – 2.39)   | 1.38 (0.85 – 2.23)       |
| <b>Recent/Past/Distant past use of 5ARI</b>      | 14 (8.2)         | 55 (7.1)             | 1.32 (0.71 – 2.47)   | 1.29 (0.67 – 2.48)       |
| <b>Current use of 5ARI + AB</b>                  | 19 (11.1)        | 81 (10.4)            | 1.22 (0.71 – 2.10)   | 1.07 (0.58 – 1.99)       |
| <b>Recent/Past/Distant past use of 5ARI + AB</b> | 6 (3.5)          | 11 (1.4)             | 2.84 (1.03 – 7.85)   | 2.93 (1.03 – 8.38)       |
| <b>Unknown</b>                                   |                  |                      |                      |                          |
| <b>Timing of 5ARI Prescriptions</b>              |                  |                      |                      |                          |
| <b>AB only</b>                                   | 16 (80.0)        | 48 (71.6)            | 1.0 (reference)      | 1.0 (reference)          |
| <b>Current use of 5ARI</b>                       | NR               | NR                   | **                   | **                       |
| <b>Recent/Past/Distant past use of 5ARI</b>      | NR               | 5 (7.5)              | 1.20 (0.21 – 6.80)   | 2.01 (0.19 – 21.50)      |
| <b>Current use of 5ARI + AB</b>                  | NR               | NR                   | **                   | **                       |
| <b>Recent/Past/Distant past use of 5ARI + AB</b> | NR               | 9 (13.4)             | **                   | **                       |

Variables are presented as N (%); OR=Odds Ratio; 95%CI=95% Confidence Interval; NR= Not Reportable

Current use = 5ARI use less than 30 days prior to the index date; Recent use = 5ARI use 31 – 119 days prior to the index date; Past use = 5ARI use 120 – 305 days prior to the index date; Distant past use = 5ARI use more than 305 days prior to the index date.

\*Adjusted for cardiovascular disease, chronic kidney disease, switch, body mass index and CCI. Conditional on the matching factors.

\*\* Too few cases and/or controls

**Supplement 3:** Crude and adjusted odds ratios and distribution of exposure at index date among venous thromboembolism cases and matched controls. End of use defined as within 14 days of last prescription length: BPH patients aged 40 – 79 in CPRD GOLD 1995 – 2015.

|                                                  | <b>Cases<br/>(n=266)</b> | <b>Controls<br/>(n=1061)</b> | <b>Crude OR</b>    | <b>Adjusted* OR</b> |
|--------------------------------------------------|--------------------------|------------------------------|--------------------|---------------------|
| <b>Any Exposure at Index Date</b>                |                          |                              |                    |                     |
| <b>AB only</b>                                   | 169 (63.5%)              | 713 (67.2%)                  | Reference          | Reference           |
| <b>Current use of 5ARI ± AB</b>                  | 64 (24.1%)               | 243 (22.9%)                  | 1.26 (0.90 – 1.77) | 1.29 (0.85 – 1.94)  |
| <b>Recent/Past/Distant past use of 5ARI ± AB</b> | 33 (12.4%)               | 105 (9.9%)                   | 1.09 (0.70 – 1.69) | 1.55 (0.96 – 2.51)  |
| <b>Recency by Exposure at Index Date</b>         |                          |                              |                    |                     |
| <b>AB only</b>                                   | 169 (63.5%)              | 713 (67.2%)                  | Reference          | Reference           |
| <b>Current use of 5ARI</b>                       | 38 (14.3%)               | 133 (12.5%)                  | 1.22 (0.80 – 1.85) | 1.36 (0.86 – 2.13)  |
| <b>Recent/Past/Distant past use of 5ARI</b>      | 26 (9.8%)                | 85 (8.0%)                    | 1.31 (0.81 – 2.13) | 1.49 (0.86 – 2.13)  |
| <b>Current use of 5ARI + AB</b>                  | 26 (9.8%)                | 110 (10.4%)                  | 1.01 (0.62 – 1.64) | 1.17 (0.64 – 2.12)  |
| <b>Recent/Past/Distant past use of 5ARI + AB</b> | 7 (2.6%)                 | 20 (1.9%)                    | 1.50 (0.61 – 3.70) | 1.77 (0.65 – 4.80)  |

Variables are presented as N (%); OR=Odds Ratio; 95%CI=95% Confidence Interval

Current use = 5ARI use within 14 days prior to the index date; Recent use = 5ARI use 15 – 119 days prior to the index date; Past use = 5ARI use 120 – 305 days prior to the index date; Distant past use = 5ARI use more than 305 days prior to the index date.

\*Adjusted for cardiovascular disease, chronic kidney disease, switch, body mass index and CCI. Conditional on the matching factors.

**Supplement 4:** Crude and adjusted odds ratio for the association between 5ARI exposure and venous thromboembolism stratified by recency of 5ARI or AB use: BPH patients aged 40-79 in CPRD GOLD 1995 – 2015.

|                               | <b>Cases<br/>(n=266)</b> | <b>Controls<br/>(n=1061)</b> | <b>Crude OR<br/>(95% CI)</b> | <b>Adjusted* OR (95%<br/>CI)</b> |
|-------------------------------|--------------------------|------------------------------|------------------------------|----------------------------------|
| <b>Current Use</b>            |                          |                              |                              |                                  |
| <b>Exposure at Index Date</b> |                          |                              |                              |                                  |
| <b>AB only</b>                | 96 (57.8)                | 399 (61.5)                   | 1.0 (reference)              | 1.0 (reference)                  |
| <b>5ARI</b>                   | 44 (26.5)                | 138 (21.3)                   | 1.33 (0.88 – 1.99)           | 1.31 (0.85 – 2.04)               |
| <b>5ARI + AB</b>              | 26 (15.7)                | 112 (17.3)                   | 0.97 (0.60 – 1.56)           | 0.96 (0.54 – 1.69)               |
| <b>Recent-Past Use</b>        |                          |                              |                              |                                  |
| <b>Exposure at Index Date</b> |                          |                              |                              |                                  |
| <b>AB</b>                     | 24 (82.8)                | 44 (67.7)                    | 1.0 (reference)              | 1.0 (reference)                  |
| <b>5ARI</b>                   | NR                       | 15 (23.1)                    | 0.49 (0.15 – 1.64)           | 0.56 (0.11 – 2.92)               |
| <b>5ARI + AB</b>              | NR                       | 6 (9.2)                      | 0.31 (0.04 – 2.69)           | 0.11 (0.01 – 1.68)               |
| <b>Distant Use</b>            |                          |                              |                              |                                  |
| <b>Exposure at Index Date</b> |                          |                              |                              |                                  |
| <b>AB</b>                     | 49 (69.0)                | 270 (77.8)                   | 1.0 (reference)              | 1.0 (reference)                  |
| <b>5ARI</b>                   | 16 (22.5)                | 65 (18.7)                    | 1.36 (0.73 – 2.54)           | 1.50 (0.74 – 3.01)               |
| <b>5ARI + AB</b>              | 6 (8.5)                  | 12 (3.5)                     | 2.76 (0.99 – 7.69)           | 3.56 (1.12 – 11.28)              |

Variables are presented as N (%); OR=Odds Ratio; 95%CI=95% Confidence Interval; NR=Not Reportable; Current use = 5ARI use less than 30 days prior to the index date; Recent use = 5ARI use 30-119 days prior to the index date; Past use = 5ARI use 120-305 days prior to the index date; Distant use = 5ARI use more than 305 days prior to the index date.

\*Adjusted for cardiovascular disease, chronic kidney disease, switch, body mass index and CCI. Conditional on the matching factors.
